# Supplementary material
Source: PubMed Central journal article supplement (PMC5923155)
Supplement: AAC.02424-17_zac005187082s1.pdf [file AAC.02424-17_zac005187082s1.pdf]

### Supplementary Figure

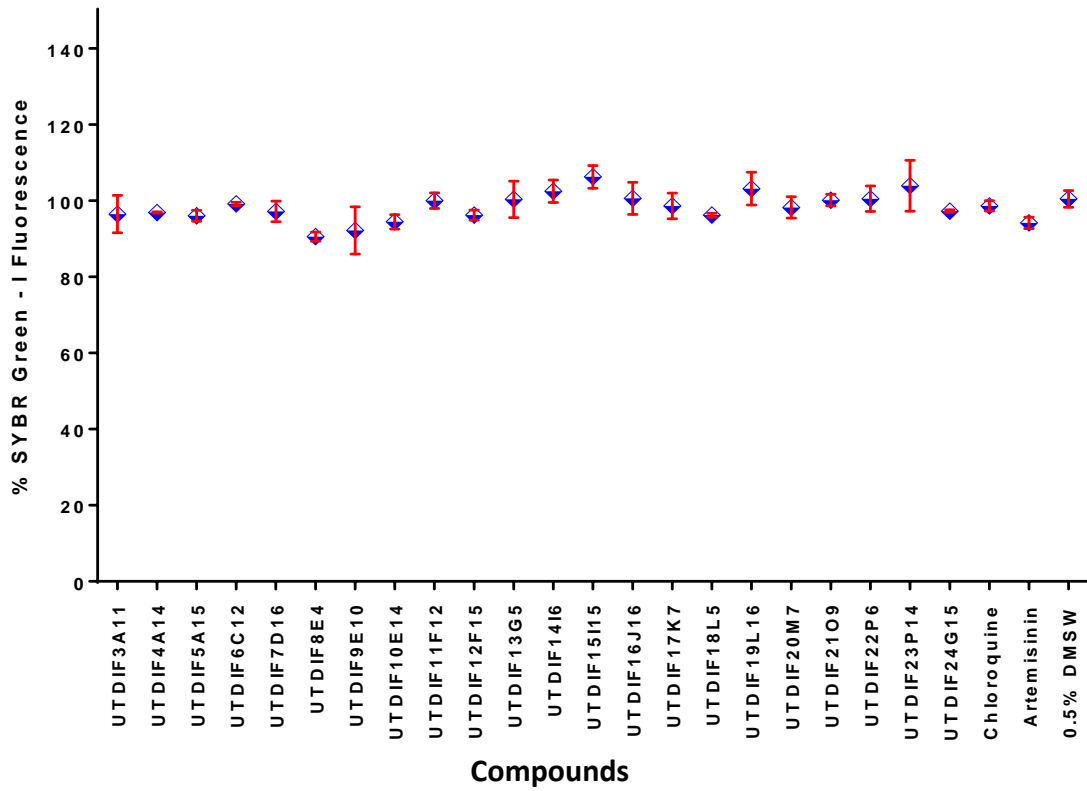

**Figure S1.** The percent of fluorescence of 22 compounds, Artemisinin and Chloroquine (positive control) and 0.5% DMSO (negative control) have shown. The percent of fluorescence of all compounds are compared with the percent of fluorescence of 0.5% DMSO (negative control).
